# Supplementary material for: Neutrophil/lymphocyte and platelet/lymphocyte ratios as a biomarker in postoperative wound infections
Source: publisher site journal article supplement (doi:10.1515/tjb-2021-0274), 2022-08-23
Supplement: Supplementary file 1 [file j_tjb-2021-0274_suppl_001.docx]

| **Supplemental Table 1:** Univariate and multivariate logistic regression analysis of all parameters in the surgery wound infections | | | | | | | | | | |
| --- | --- | --- | --- | --- | --- | --- | --- | --- | --- | --- |
| Univariate logistic regression analysis | | | | | | Multivariate logistic regression analysis | | | | |
| Parameters | B | SE | OR | 95% CI  Lower-Upper | p-Value | B | SE | OR | 95% CI  Lower-upper | p-Value |
| Age | -0.015 | 0.013 | 0.985 | 0.961-1.0010 | 0.249 | 0.034 | 0.016 | 1.034 | 1.002-1.068 | 0.035 |
| Gender | 0.075 | 0.388 | 1.078 | 0.504-2.304 | 0.846 | 0.163 | 0.449 | 1.177 | 0.488-2.837 | 0.716 |
| WBC | 0.175 | 0.060 | 1.191 | 1.059-1.340 | 0.003 | 0.549 | 0.312 | 1.118 | 0.607-2.061 | 0.271 |
| Neutrophil | 0.220 | 0.069 | 1.246 | 1.089-1.426 | 0.001 | - | - | - | - | - |
| Lymphocyte | -0.638 | 0.275 | 0.528 | 0.308-0.905 | 0.020 | - | - | - | - | - |
| PLT | 0.000 | 0.001 | 1.000 | 0.998-1.002 | 0.882 | - | - | - | - | - |
| ESR | 0.009 | 0.006 | 1.009 | 0.997-1.021 | 0.134 | - | - | - | - | - |
| CRP | 0.010 | 0.003 | 1.010 | 1.003-1.016 | 0.002 | 1.382 | 0.551 | 3.892 | 1.112-14.60 | 0.034 |
| NLR | 0.177 | 0.073 | 1.194 | 1.035-1.377 | 0.015 | 1.161 | 0.553 | 3.194 | 1.081-9.438 | 0.036 |
| PLR | 0.001 | 0.001 | 1.001 | 0.999-1.004 | 0.318 | 0.124 | 0.555 | 1.132 | 0.393-3.361 | 0.824 |

*p < 0.05 statistically significant.*

*WBC, white blood cell; PLT, platelet; ESR,* erythrocyte *sedimentation*rate; *CRP, C-reactive protein; NLR, neutrophil/ lymphocyte ratio; PLR, platelet/lymphocyte ratio; SE, standart error; OR,odds ratio; CI, confidence interval.*
