# Supplementary material for: Neutrophil/lymphocyte and platelet/lymphocyte ratios as a biomarker in postoperative wound infections
Source: publisher site journal article supplement (doi:10.1515/tjb-2021-0274), 2022-08-23
Supplement: Supplementary file 2 [file j_tjb-2021-0274_suppl_002.docx]

**Supplemental Table 2.** Diagnostic performance of laboratory measurements of patients

|  | Cutoff | | NPV, %  (95% CI) | PPV, %  (95% CI) | Specificity, % (95 %CI) | Sensitivity, % (95% CI) | Accuracy, %  (95% CI) |
| --- | --- | --- | --- | --- | --- | --- | --- |
| WBC, 103 /µL | | >10 | 52  (49-55) | 76  (72-80) | 78  (74-82) | 50  (47-52) | 62  (59-65) |
| Neutrophil, 103 /µL | | >6.98 | 55  (53-57) | 81  (78-84) | 84  (81-87) | 51  (49-53) | 65  (62-68) |
| Lymphocyte, 103 /µL | | <0.8 | 45  (42-48) | 81  (76-87) | 94  (88-100) | 20  (19-21) | 50  (47-53) |
| PLT, 103 /µL | | <150 | 40  (37-1) | 46  (42-50) | 86  (79-93) | 9  (8-10) | 40  (37-43) |
| ESR, mm/hour | | >20 | 71  (66-76) | 60  (56-64) | 27  ( 25-29) | 91  (85-97 ) | 62  (58-66) |
| CRP, mg/L | | >5 | 78  (75-81) | 65  (63-67) | 28  (27-29 ) | 94  (91-97) | 67  (65-69) |
| NLR | | >3.5 | 60  (58-62) | 74  (71-77) | 66  (63-69 ) | 68  (65-71) | 79  (76-82) |
| PLR | | >135 | 49  (45-53) | 63  (58-68) | 42  (39-45 ) | 71  (66-76) | 59  (55-63) |

*WBC, white blood cell; PLT, platalet; ESR,* erythrocyte*sedimentation*rate; *CRP, C-reactive protein; NLR, neutrophil/ lymphocyte ratio; PLR, platalet/lymphocyte ratio; PPV, positive predictive value; NPV, negative predictive value; CI, confidence interval.*
