# Supplementary material for: Neutrophil/lymphocyte and platelet/lymphocyte ratios as a biomarker in postoperative wound infections
Source: publisher site journal article supplement (doi:10.1515/tjb-2021-0274), 2022-08-23
Supplement: Supplementary file 3 [file j_tjb-2021-0274_suppl_003.docx]

**Supplemental Table 3.** ROC analysis of laboratory measurements of the patients

| Test Result  Variables | AUC | Standard Error | Asymptotic Significantly | Asymptotic 95% Confidence Interval | |
| --- | --- | --- | --- | --- | --- |
| Lower Bound | Upper Bound |
| WBC | 0.647 | 0.050 | 0.006 | 0.549 | 0.744 |
| Neutrophil | 0.681 | 0.049 | 0.001 | 0.585 | 0.776 |
| Lymphocyte | 0.621 | 0.052 | 0.024 | 0.520 | 0.723 |
| PLT | 0.589 | 0.054 | 0.098 | 0.484 | 0.694 |
| ESR | 0.609 | 0.053 | 0.042 | 0.506 | 0.713 |
| CRP | 0.705 | 0.048 | 0.000 | 0.611 | 0.799 |
| NLR | 0.688 | 0.049 | 0.000 | 0.593 | 0.784 |
| PLR | 0.617 | 0.054 | 0.030 | 0.510 | 0.724 |

*ROC, receiver operator curve; AUC, area under curve; WBC, white blood cell; PLT, platelet; ESR,* erythrocyte*sedimentation*rate; *CRP, C-reactive protein; NLR, neutrophil/ lymphocyte ratio; PLR, platelet/lymphocyte ratio.*
